# Supplementary material
Source: publisher site journal article supplement (http://www.kjim.org/upload/media/kjim-2022-369-Supplementary-Fig-2.pdf)
Supplement: Supplementary file 1 [file kjim-2022-369-Supplementary-Fig-2.pdf]

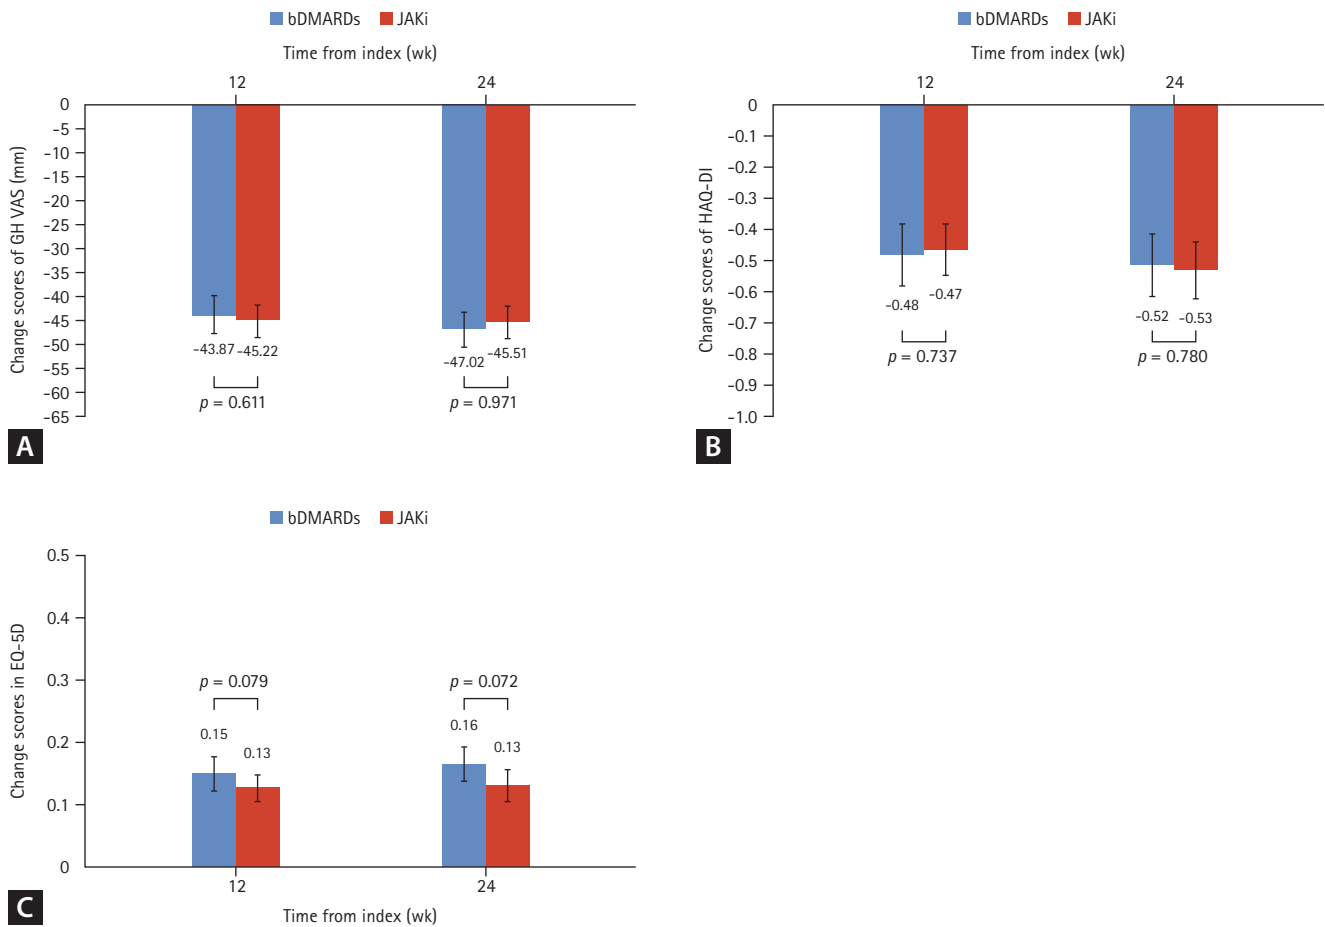

**Supplementary Figure 2.** Change scores in patient-reported outcomes of (A) GH VAS, (B) HAQ-DI, and (C) EQ-5D in the bDMARD and JAKi groups (PP analysis). Bar presents the mean with a 95% confidence interval of change scores in patient-reported outcomes. GH VAS, Global Health assessment using Visual Analogue Scale; HAQ-DI, health assessment questionnaire-disability index; EQ-5D, EuroQol-5 dimension; bDMARD, biologic disease-modifying antirheumatic drug; JAKi, Janus kinase inhibitors; PP: per protocol.
